# Supplementary material for: Correlation between Previous Antibiotic Exposure and COVID-19 Severity. A Population-Based Cohort Study
Source: MDPI journal article supplement (doi:10.3390/antibiotics10111364), 2021-11-08
Supplement: s1 [file s1]

## ONLINE SUPPLEMENTAL MATERIAL TABLES

**TABLE S1. Family of antibiotic dispensed\*.**

| ATC classification | Family name and antibiotics                                                                                                                                                                                     | No (% of the total)                                                                                              |
|--------------------|-----------------------------------------------------------------------------------------------------------------------------------------------------------------------------------------------------------------|------------------------------------------------------------------------------------------------------------------|
| J01A               | Tetracyclines<br>- J01AA02 Doxycycline<br>- Others                                                                                                                                                              | 3,951 (1.0)<br>3,340 (0.8)<br>609 (0.2)                                                                          |
| J01C               | Penicillins<br>- J01CA04 Amoxicillin<br>- J01CF02 Cloxacillin<br>- J01CE02 Penicillin V<br>- J01CR02 Amoxicillin and clavulanic acid<br>- Others                                                                | 181,815 (47.9)<br>86,804 (22.9)<br>3,824 (1.0)<br>2,315 (0.9)<br>87,512 (23.1)<br>360 (0)                        |
| J01D               | Other beta-lactams (cephalosporins)<br>- J01DC02 Cefuroxime<br>- J01DD08 Cefixime<br>- J01DD16 Cefditoren<br>- J01DB05 Cefadroxil<br>- Others                                                                   | 21,871 (5.8)<br>274 (0.0)<br>5,249 (1.4)<br>1,901 (0.5)<br>730 (0.2)<br>717 (0.2)                                |
| J01E               | Sulfonamides and trimethoprim<br>- J01EE01 Cotrimoxazole<br>- Others                                                                                                                                            | 10,309 (2.7)<br>10,272 (2.7)<br>37 (0)                                                                           |
| J01F               | Macrolides, lincosamides and streptogramins<br>- J01FA01 Erythromycin<br>- J01FA07 Josamycin<br>- J01FA09 Clarithromycin<br>- J01FA10 Azithromycin<br>- J01FF01 Clindamycin<br>- J01RA04 Spiramycin<br>- Others | 63,783 (16.8)<br>737 (0.2)<br>401 (0.1)<br>8,078 (2.1)<br>47,802 (12.6)<br>5,985 (1.6)<br>1,046 (0.2)<br>147 (0) |
| J01G               | Aminoglycosides                                                                                                                                                                                                 | 192 (0.1)                                                                                                        |

|       |                          |               |
|-------|--------------------------|---------------|
| J01M  | Quinolones               | 54,317 (14.3) |
|       | - J01MA02 Ciprofloxacin  | 23,130 (6.1)  |
|       | - J01MA06 Norfloxacin    | 972 (1.1)     |
|       | - J01MA12 Levofloxacin   | 25,306 (6.7)  |
|       | - J01MA14 Moxifloxacin   | 1,851 (0.5)   |
|       | - Others                 | 58 (0)        |
| J01X  | Other antibacterials     | 43,284 (11.4) |
|       | - J01XX01 Fosfomycin     | 4,430 (10.7)  |
|       | - J01XE01 Nitrofurantoin | 2,243 (0.6)   |
|       | - Others                 | 202 (0)       |
| Total |                          | 379,522       |

ATC=Anatomical Therapeutic Chemical.

\*Only antibiotics that account for at least 0.1% of the total are shown.

**TABLE S2. Marginal structural model of the adjusted association between exposure to the most common families of antibacterial agents among patients with COVID-19 infection and the composite severity endpoint, combining death, hospitalization and/or pneumonia related to COVID-19 infection.**

|                                                      | Patients exposed to antibiotics and diagnosed with non-severe COVID-19 (n: 130,828) | Patients exposed to antibiotics and diagnosed with COVID-19 with the composite severity endpoint (n: 15,828) | Univariable        |         | Multivariable*     |         |
|------------------------------------------------------|-------------------------------------------------------------------------------------|--------------------------------------------------------------------------------------------------------------|--------------------|---------|--------------------|---------|
|                                                      |                                                                                     |                                                                                                              | OR (95% CI)        | P-value | OR (95% CI)        | P-value |
| J01C – Penicillins**                                 | 71,065 (54.3)                                                                       | 6,680 (42.2)                                                                                                 | 0.61 (0.59 - 0.63) | <0.0001 | 0.72 (0.69 -0.74)  | <0.0001 |
| J01D - Cephalosporins**                              | 6,270 (4.8)                                                                         | 1,261 (8.0)                                                                                                  | 1.72 (1.61 - 1.83) | <0.0001 | 1.45 (1.36 - 1.55) | <0.0001 |
| J01F - Macrolides, lincosamides and streptogramins** | 23,985 (18.3)                                                                       | 2,708 (17.1)                                                                                                 | 0.92 (0.88 - 0.96) | 0.0001  | 0.99 (0.94 - 1.04) | 0.6446  |
| J01M – Quinolones**                                  | 14,402 (11.0)                                                                       | 3,268 (20.6)                                                                                                 | 2.10 (2.02 - 2.19) | <0.0001 | 1.49 (1.43 - 1.56) | <0.0001 |
| J01X - Other antibacterial agents**                  | 12,448 (9.5)                                                                        | 1,357 (8.6)                                                                                                  | 0.89 (0.84 - 0.95) | 0.0001  | 0.91 (0.85 - 0.96) | 0.0017  |

\*Weighted for age, sex, socioeconomic status and adjusted for the variables included in the table: smoking, body mass index, comorbidities of interest, concomitant medication. Final set of predictors selected by means of AIC-based stepwise algorithm.

\*\*Compared to other individuals exposed to antibiotics

**TABLE S3. Marginal structural models of the adjusted association between exposure to antibiotics among patients with COVID-19 infection and severe endpoints related to COVID-19.**

| Variable                                | No             | Yes           | Univariate         |            | Multivariate*      |            |
|-----------------------------------------|----------------|---------------|--------------------|------------|--------------------|------------|
|                                         |                |               | OR (95% CI)        | P-value    | OR (95% CI)        | P-value    |
| Pneumonia                               |                |               |                    |            |                    |            |
| No.                                     | 275,525        | 5,154         |                    |            |                    |            |
| Exposed to antibiotics                  | 1435,81 (52.1) | 3,075 (59.7)  | 1.33 (0.91 - 1.93) | 0.1394     | 1.18 (0.81 - 1.74) | 0.3877     |
| High exposure ( $\geq 5$ antibiotics)** | 14,580 (5.3)   | 335 (6.5)     | 1.08 (0.97 - 1.21) | 0.1794     | 0.95 (0.84 - 1.06) | 0.3489     |
| Recent exposure ( $< 2$ months)**       | 57,347 (39.9)  | 1,829 (59.5)  | 2.20 (2.05 - 2.37) | $< 0.0001$ | 2.11 (1.96 - 2.28) | $< 0.0001$ |
| Exposed to HPClAs**                     | 46,132 (32.1)  | 1,345 (43.7)  | 1.64 (1.53 - 1.76) | $< 0.0001$ | 1.58 (1.47 - 1.70) | $< 0.0001$ |
| Hospitalization                         |                |               |                    |            |                    |            |
| No.                                     | 264,242        | 16,437        |                    |            |                    |            |
| Exposed to antibiotics                  | 136,477 (51.6) | 10,179 (61.9) | 1.44 (1.29 - 1.60) | $< 0.0001$ | 1.14 (1.02 - 1.27) | 0.0222     |
| High exposure ( $\geq 5$ antibiotics)** | 13,449 (5.1)   | 1,466 (8.9)   | 1.54 (1.45 - 1.63) | $< 0.0001$ | 1.09 (1.02 - 1.16) | $< 0.01$   |
| Recent exposure ( $< 2$ months)**       | 53,725 (39.4)  | 5,451 (53.6)  | 1.78 (1.71 - 1.85) | $< 0.0001$ | 1.55 (1.49 - 1.62) | $< 0.0001$ |
| Exposed to HPClAs**                     | 43,327 (31.7)  | 4,150 (40.8)  | 1.48 (1.42 - 1.54) | $< 0.0001$ | 1.30 (1.25 - 1.36) | $< 0.0001$ |
| Death                                   |                |               |                    |            |                    |            |
| No.                                     | 272,704        | 7,975         |                    |            |                    |            |
| Exposed to antibiotics                  | 141,402 (51.9) | 5,254 (65.9)  | 1.37 (1.21 - 1.57) | $< 0.0001$ | 1.10 (0.96 - 1.26) | 0.1797     |

|                                         |               |              |                    |         |                    |         |
|-----------------------------------------|---------------|--------------|--------------------|---------|--------------------|---------|
| High exposure ( $\geq 5$ antibiotics)** | 13,754 (5.0)  | 1,161 (14.6) | 2.63 (2.46 - 2.82) | <0.0001 | 1.44 (1.33 - 1.55) | <0.0001 |
| Recent exposure (<2 months)**           | 56,999 (40.3) | 2,177 (41.4) | 1.05 (0.99 - 1.11) | 0.1026  | 0.77 (0.72 - 0.82) | <0.0001 |
| Exposed to HPCIA <sup>s</sup> **        | 45,263 (32.0) | 2,214 (42.1) | 1.55 (1.46 - 1.64) | <0.0001 | 1.18 (1.11 - 1.25) | <0.0001 |

HPCIA=Highest priority critically important antimicrobial.

\*Weighted for age, sex, socioeconomic status and adjusted for the variables included in the table: smoking, body mass index, comorbidities of interest, concomitant medication. Final set of predictors selected by means of AIC-based stepwise algorithm.

\*\*Compared to other individuals exposed to antibiotics.

**TABLE S4. Codes related to COVID-19 infection considered (ICD-10 + thesaurus).**

| ICD-10 code | Description                                                                                                          |
|-------------|----------------------------------------------------------------------------------------------------------------------|
| B97.29      | Other types of coronavirus diseases causing classified diseases elsewhere                                            |
| B34.2       | Non-specified coronavirus infection                                                                                  |
| B97.21      | Coronavirus infection associated with severe acute respiratory syndrome (SARS) causing classified diseases elsewhere |
| J12.81      | Coronavirus pneumonia associated with severe acute respiratory syndrome (SARS)                                       |
| J12.89      | Other types of viral pneumonia                                                                                       |
| Z20.828     | Suspected COVID-19 infection                                                                                         |

ICD-10=International Classification of Diseases, 10<sup>th</sup> revision
